# Supplementary material
Source: publisher figshare collection journal article supplement (https://acs.figshare.com/ndownloader/files/3886108)
Supplement: Supplementary file 1 [file 3886108]

## Sheet: Table index
Table	Description
S0	Column descriptions for S1 - S10
S1	Functional enrichment analysis of Gene Ontology, Pfam and KEGG terms of increased proteins from class 1-3
S2	Functional enrichment analysis of KEGG terms of increased proteins from class 1-3
S3	Functional enrichment analysis of Gene Ontology Cellular Compartment terms of increased proteins from class 1-3
S4	Functional enrichment analysis of Gene Ontology Molecular Funtion terms of increased proteins from class 1-3
S5	Functional enrichment analysis of Gene Ontology, Pfam and KEGG terms of increased phosphorylation sites from class 1-3
S6	Functional enrichment analysis of KEGG terms of increased phosphorylation sites from class 1-3
S7	Functional enrichment analysis of Protein family names of increased phosphorylation sites from class 1-3
S8	Functional enrichment analysis of Gene Ontology Cellular Compartment terms of increased phosphorylation sites from class 1-3
S9	Functional enrichment analysis of Gene Ontology Molecular Funtion terms of increased phosphorylation sites from class 1-3
S10	Functional enrichment analysis of Gene Ontology Biological Process terms of increased phosphorylation sites from class 1-3

## Sheet: S0
S1-S10
Column	Description
Category column	Indication of the category (Gene Ontology, Pfam or KEGG)
Category value	Name of the category
Total size	Size of the total dataset used
Selection size	Size of the choosen set of interest
Category size	Size of the category in total dataset
Intersection size	Size of the category in choosen dataset
Enrichment factor	Enrichment factor
P value	P value score
Benj. Hoch. FDR	Corrected p-value score
+/-10 log2(p)	Log transformation of the p-value

## Sheet:  S1 (All)
Category column	Category value	Total size	Selection size	Category size	Intersection size	Enrichment factor	P value	Benj. Hoch. FDR
GOCC name	non-membrane-bounded organelle	6235	245	739	56	1.9285	3.2908e-07	0.00014447
GOCC name	intracellular non-membrane-bounded organelle	6235	245	739	56	1.9285	3.2908e-07	0.00028893
KEGG name	Cell cycle	6235	245	77	13	4.2966	6.2168e-06	0.00080508
GOCC name	membrane part	6235	245	1016	17	0.42582	4.7436e-06	0.00083298
GOCC name	integral to membrane	6235	245	650	7	0.27407	3.9989e-06	0.00087777
GOCC name	nucleolus	6235	245	235	25	2.7073	3.1096e-06	0.00091008
KEGG name	Pyrimidine metabolism	6235	245	63	12	4.8474	3.9377e-06	0.0010199
GOCC name	intrinsic to membrane	6235	245	668	8	0.30478	8.1539e-06	0.0011932
GOMF name	adenyl nucleotide binding	6235	245	742	50	1.7149	3.5611e-05	0.010907
GOMF name	purine nucleotide binding	6235	245	905	58	1.631	3.339e-05	0.011931
GOCC name	membrane	6235	245	1123	24	0.54388	0.00010495	0.013163
GOMF name	adenyl ribonucleotide binding	6235	245	740	50	1.7195	3.3292e-05	0.014275
GOMF name	ribonucleotide binding	6235	245	903	58	1.6346	3.141e-05	0.016836
GOCC name	cytoplasm	6235	245	1209	69	1.4524	0.00019028	0.018563
GOCC name	nucleolar part	6235	245	15	5	8.483	0.00018253	0.020032
GOMF name	catalytic activity	6235	245	2143	111	1.3182	7.8343e-05	0.020996
GOMF name	purine ribonucleotide binding	6235	245	903	58	1.6346	3.141e-05	0.022447
KEGG name	Purine metabolism	6235	245	85	11	3.2934	0.00034092	0.029433
GOMF name	ATP binding	6235	245	737	50	1.7265	3.0069e-05	0.032234
GOCC name	cytoplasmic part	6235	245	2203	64	0.73933	0.00041449	0.033084
GOCC name	mitochondrial part	6235	245	298	2	0.1708	0.00039205	0.034422
KEGG name	p53 signaling pathway	6235	245	28	6	5.4534	0.00055184	0.035732

## Sheet: S2 (KEGG)
Category column	Category value	Total size	Selection size	Category size	Intersection size	Enrichment factor	P value	Benj. Hoch. FDR	+/-10 log2(p)
KEGG name	Cell cycle	6235	245	77	13	4.2966	6.2168e-06	0.00080508	102.786
KEGG name	Pyrimidine metabolism	6235	245	63	12	4.8474	3.9377e-06	0.0010199	99.3736
KEGG name	Purine metabolism	6235	245	85	11	3.2934	0.00034092	0.029433	50.8642
KEGG name	p53 signaling pathway	6235	245	28	6	5.4534	0.00055184	0.035732	48.0664

## Sheet: S3 (GOCC)
Category column	Category value	Total size	Selection size	Category size	Intersection size	Enrichment factor	P value	Benj. Hoch. FDR	+/-10 log2(p)
GOCC name	membrane part	6235	245	1016	17	0.42582	4.7436e-06	0.00083298	-102.294
GOCC name	integral to membrane	6235	245	650	7	0.27407	3.9989e-06	0.00087777	-101.539
GOCC name	intrinsic to membrane	6235	245	668	8	0.30478	8.1539e-06	0.0011932	-97.1095
GOCC name	membrane	6235	245	1123	24	0.54388	0.00010495	0.013163	-62.4737
GOCC name	cytoplasmic part	6235	245	2203	64	0.73933	0.00041449	0.033084	-49.1772
GOCC name	mitochondrial part	6235	245	298	2	0.1708	0.00039205	0.034422	-48.6053
GOCC name	non-membrane-bounded organelle	6235	245	739	56	1.9285	3.2908e-07	0.00014447	127.569
GOCC name	intracellular non-membrane-bounded organelle	6235	245	739	56	1.9285	3.2908e-07	0.00028893	117.57
GOCC name	nucleolus	6235	245	235	25	2.7073	3.1096e-06	0.00091008	101.017
GOCC name	cytoplasm	6235	245	1209	69	1.4524	0.00019028	0.018563	57.5143
GOCC name	nucleolar part	6235	245	15	5	8.483	0.00018253	0.020032	56.4155

## Sheet: S4 (GOMF)
Category column	Category value	Total size	Selection size	Category size	Intersection size	Enrichment factor	P value	Benj. Hoch. FDR	+/-10 log2(p)
GOMF name	adenyl nucleotide binding	6235	245	742	50	1.7149	3.5611e-05	0.010907	65.186
GOMF name	purine nucleotide binding	6235	245	905	58	1.631	3.339e-05	0.011931	63.8914
GOMF name	adenyl ribonucleotide binding	6235	245	740	50	1.7195	3.3292e-05	0.014275	61.3037
GOMF name	ribonucleotide binding	6235	245	903	58	1.6346	3.141e-05	0.016836	58.9231
GOMF name	catalytic activity	6235	245	2143	111	1.3182	7.8343e-05	0.020996	55.7374
GOMF name	purine ribonucleotide binding	6235	245	903	58	1.6346	3.141e-05	0.022447	54.7733
GOMF name	ATP binding	6235	245	737	50	1.7265	3.0069e-05	0.032234	49.5527

## Sheet: S5 (All)
Category column	Category value	Total size	Selection size	Category size	Intersection size	Enrichment factor	P value	Benj. Hoch. FDR
GOBP name	respiratory electron transport chain	9397	341	23	16	19.17	1.2269e-18	6.7001e-15
GOCC name	nucleocytoplasmic shuttling complex	9397	341	22	15	18.789	2.4545e-17	9.3147e-15
GOCC name	NLS-dependent protein nuclear import complex	9397	341	22	15	18.789	2.4545e-17	1.8629e-14
Pfam	DNA_pol_phi	9397	341	22	15	18.789	2.4545e-17	3.7431e-14
GOBP name	electron transport chain	9397	341	27	16	16.33	5.6659e-17	1.5471e-13
GOMF name	DNA-directed DNA polymerase activity	9397	341	39	16	11.306	1.0726e-13	6.3875e-11
GOMF name	structural molecule activity	9397	341	269	39	3.9953	5.7338e-14	6.829e-11
GOBP name	cellular response to glucose starvation	9397	341	36	15	11.482	4.8806e-13	8.8843e-10
GOMF name	DNA polymerase activity	9397	341	48	16	9.1857	4.6653e-12	1.8521e-09
GOCC name	intracellular organelle part	9397	341	4338	217	1.3785	1.5757e-11	2.9898e-09
GOCC name	organelle part	9397	341	4406	219	1.3697	2.171e-11	3.2956e-09
GOCC name	actin cap	9397	341	20	11	15.156	1.4943e-11	3.7805e-09
GOCC name	large ribosomal subunit	9397	341	27	12	12.248	4.3926e-11	5.5566e-09
Pfam	Caldesmon	9397	341	20	11	15.156	1.4943e-11	7.5959e-09
Pfam	Filament	9397	341	75	19	6.9812	1.0641e-11	8.1138e-09
GOCC name	intermediate filament	9397	341	84	19	6.2332	8.9296e-11	9.6823e-09
GOCC name	non-membrane-bounded organelle	9397	341	2360	137	1.5997	1.8103e-10	1.5267e-08
GOCC name	intracellular non-membrane-bounded organelle	9397	341	2360	137	1.5997	1.8103e-10	1.7175e-08
GOBP name	RNA transport	9397	341	116	22	5.2264	1.1167e-10	6.7758e-08
GOCC name	lamin filament	9397	341	27	11	11.227	9.0257e-10	6.8505e-08
GOBP name	nucleobase-containing compound transport	9397	341	116	22	5.2264	1.1167e-10	7.6227e-08
GOBP name	regulation of cyclin-dependent protein kinase activity involved in G2/M	9397	341	7	7	27.557	7.8057e-11	8.5253e-08
GOBP name	nucleic acid transport	9397	341	116	22	5.2264	1.1167e-10	8.7117e-08
GOBP name	establishment of RNA localization	9397	341	116	22	5.2264	1.1167e-10	1.0164e-07
GOBP name	regulation of smooth muscle contraction	9397	341	24	11	12.63	1.9242e-10	1.0508e-07
GOBP name	positive regulation of cyclin-dependent protein kinase activity involved in G2/M	9397	341	7	7	27.557	7.8057e-11	1.0657e-07
GOBP name	signal transduction by p53 class mediator resulting in induction of apoptosis	9397	341	54	15	7.6548	4.0056e-10	1.9886e-07
GOMF name	structural constituent of ribosome	9397	341	48	14	8.0375	7.6222e-10	2.2695e-07
GOCC name	nuclear membrane	9397	341	203	27	3.6652	3.3104e-09	2.2842e-07
GOBP name	nucleocytoplasmic transport	9397	341	162	25	4.2527	5.7484e-10	2.4148e-07
GOBP name	nuclear transport	9397	341	162	25	4.2527	5.7484e-10	2.616e-07
Pfam	LTD	9397	341	27	11	11.227	9.0257e-10	3.441e-07
GOBP name	positive regulation of cell cycle arrest	9397	341	57	15	7.2519	9.1773e-10	3.5798e-07
GOCC name	germinal vesicle	9397	341	10	7	19.29	8.4023e-09	5.3145e-07
GOBP name	mRNA transport	9397	341	100	19	5.2359	2.0364e-09	7.4139e-07
GOCC name	kinetochore	9397	341	162	23	3.9124	1.4187e-08	8.2833e-07
GOBP name	establishment of localization	9397	341	1382	90	1.7946	4.0067e-09	1.3675e-06
GOBP name	cellular response to starvation	9397	341	73	16	6.0399	4.4984e-09	1.445e-06
GOBP name	response to starvation	9397	341	75	16	5.8789	6.796e-09	2.0618e-06
GOBP name	transport	9397	341	1271	84	1.8212	7.7803e-09	2.2362e-06
GOBP name	regulation of muscle contraction	9397	341	33	11	9.1857	1.0804e-08	2.95e-06
GOCC name	organelle envelope	9397	341	113	18	4.3896	9.106e-08	4.3197e-06
GOCC name	nuclear envelope	9397	341	113	18	4.3896	9.106e-08	4.6076e-06
GOCC name	female germ cell nucleus	9397	341	13	7	14.838	1.0778e-07	4.8119e-06
GOCC name	envelope	9397	341	113	18	4.3896	9.106e-08	4.9367e-06
GOMF name	JUN kinase binding	9397	341	22	9	11.273	3.0664e-08	7.3042e-06
GOBP name	oxidation-reduction process	9397	341	84	16	5.249	3.6883e-08	9.5914e-06
GOCC name	cytoskeletal part	9397	341	1328	82	1.7016	2.2892e-07	9.653e-06
GOCC name	macromolecular complex	9397	341	3176	158	1.3709	3.0672e-07	1.2253e-05
GOBP name	signal transduction by p53 class mediator	9397	341	75	15	5.5114	5.0015e-08	1.2415e-05
GOBP name	generation of precursor metabolites and energy	9397	341	87	16	5.068	6.1486e-08	1.4599e-05
GOBP name	induction of apoptosis by intracellular signals	9397	341	77	15	5.3683	7.2072e-08	1.6399e-05
Pfam	Ribosomal_L1	9397	341	5	5	27.557	6.1164e-08	1.8655e-05
GOBP name	intracellular transport	9397	341	619	49	2.1814	9.1312e-08	1.9946e-05
GOBP name	establishment of localization in cell	9397	341	798	58	2.0029	1.0516e-07	2.2087e-05
GOBP name	positive regulation of cell cycle process	9397	341	115	18	4.3133	1.1943e-07	2.4157e-05
GOCC name	germ cell nucleus	9397	341	16	7	12.056	6.4448e-07	2.4458e-05
GOBP name	translation	9397	341	41	11	7.3934	1.3235e-07	2.5814e-05
GOBP name	regulation of muscle system process	9397	341	42	11	7.2174	1.7299e-07	3.2576e-05
GOMF name	transcription factor binding	9397	341	231	26	3.1017	1.9027e-07	3.777e-05
GOBP name	establishment of protein localization	9397	341	506	42	2.2874	2.2719e-07	4.1356e-05
GOCC name	dynein complex	9397	341	18	7	10.717	1.6674e-06	6.0266e-05
GOBP name	cellular response to nutrient levels	9397	341	99	16	4.4537	3.8302e-07	6.7474e-05
GOBP name	cellular response to extracellular stimulus	9397	341	100	16	4.4091	4.4004e-07	7.5096e-05
Pfam	DLIC	9397	341	10	6	16.534	3.9736e-07	0.000101
GOBP name	protein transport	9397	341	489	40	2.2542	6.3797e-07	0.00010557
GOCC name	protein complex	9397	341	2474	126	1.4035	3.0801e-06	0.00010626
GOCC name	condensed chromosome kinetochore	9397	341	103	15	4.0132	3.3008e-06	0.00010893
GOCC name	membrane	9397	341	1940	104	1.4773	3.4525e-06	0.00010919
GOBP name	muscle system process	9397	341	58	12	5.7015	7.4273e-07	0.0001193
GOCC name	cytoplasmic dynein complex	9397	341	14	6	11.81	4.9134e-06	0.00014917
GOCC name	nuclear inner membrane	9397	341	38	9	6.5267	5.6413e-06	0.00016468
GOMF name	nucleotidyltransferase activity	9397	341	106	16	4.1596	9.7383e-07	0.00016569
GOBP name	regulation of cell cycle	9397	341	506	40	2.1784	1.4758e-06	0.00023027
GOBP name	regulation of mitotic cell cycle spindle assembly checkpoint	9397	341	12	6	13.779	1.6258e-06	0.00023996
GOBP name	muscle contraction	9397	341	52	11	5.8294	1.7043e-06	0.00024493
GOBP name	positive regulation of mitotic cell cycle spindle assembly checkpoint	9397	341	12	6	13.779	1.6258e-06	0.00024663
Pfam	Nup35_RRM	9397	341	7	5	19.684	1.1942e-06	0.00026016
Pfam	MARCKS	9397	341	18	7	10.717	1.6674e-06	0.00031786
GOCC name	nuclear pore	9397	341	42	9	5.9051	1.3355e-05	0.00037542
GOBP name	response to organic substance	9397	341	667	6	0.24789	3.9642e-06	0.00055508
GOBP name	cell communication	9397	341	166	19	3.1541	6.3852e-06	0.00087174
GOCC name	pore complex	9397	341	47	9	5.2769	3.4065e-05	0.00092341
GOCC name	chromosomal part	9397	341	712	46	1.7804	4.1729e-05	0.0010921
KEGG name	Vasopressin-regulated water reabsorption	9397	341	18	6	9.1857	2.6262e-05	0.001707
KEGG name	Vascular smooth muscle contraction	9397	341	91	13	3.9367	1.788e-05	0.0017433
GOCC name	nuclear speck	9397	341	478	4	0.2306	6.9594e-05	0.0017607
GOBP name	response to chemical stimulus	9397	341	998	15	0.41419	1.3362e-05	0.0017797
GOBP name	nuclear division	9397	341	210	21	2.7557	1.6637e-05	0.0021129
GOCC name	cytosolic large ribosomal subunit	9397	341	14	5	9.8419	8.8207e-05	0.0021596
GOBP name	mitosis	9397	341	210	21	2.7557	1.6637e-05	0.0021632
GOBP name	cellular response to external stimulus	9397	341	133	16	3.3152	1.8056e-05	0.002241
GOBP name	positive regulation of JNK cascade	9397	341	25	7	7.716	1.9539e-05	0.0023196
GOBP name	organelle fission	9397	341	213	21	2.7169	2.0455e-05	0.0023271
GOBP name	cell surface receptor linked signaling pathway	9397	341	656	7	0.29406	2.0402e-05	0.0023705
GOBP name	positive regulation of cyclin-dependent protein kinase activity	9397	341	25	7	7.716	1.9539e-05	0.0023711
GOBP name	response to nutrient levels	9397	341	135	16	3.266	2.1657e-05	0.0024137
GOBP name	response to extracellular stimulus	9397	341	136	16	3.242	2.3684e-05	0.0025867
GOBP name	regulation of cell cycle arrest	9397	341	137	16	3.2184	2.5875e-05	0.0027706
GOCC name	nuclear inclusion body	9397	341	33	7	5.8455	0.00012988	0.0030805
GOCC name	cell cortex part	9397	341	82	11	3.6967	0.00013414	0.0030851
KEGG name	Ribosome	9397	341	43	9	5.7678	1.629e-05	0.0031766
GOBP name	RNA processing	9397	341	807	11	0.37562	3.1221e-05	0.0032788
GOBP name	positive regulation of stress-activated protein kinase signaling cascade	9397	341	27	7	7.1445	3.3568e-05	0.0034588
GOCC name	organelle inner membrane	9397	341	57	9	4.3511	0.00015664	0.0034968
GOCC name	Nup107-160 complex	9397	341	9	4	12.248	0.00017893	0.0037724
GOCC name	juxtaparanode region of axon	9397	341	16	5	8.6116	0.00017891	0.0038799
GOCC name	cytoplasm	9397	341	2816	130	1.2722	0.00021091	0.0043266
GOBP name	cell cycle process	9397	341	672	44	1.8043	4.4999e-05	0.0045508
GOBP name	transcription of nuclear large rRNA transcript from RNA polymerase I promoter	9397	341	20	6	8.2672	5.0986e-05	0.0048848
GOBP name	mRNA metabolic process	9397	341	708	9	0.3503	4.9632e-05	0.004928
GOBP name	transcription from RNA polymerase I promoter	9397	341	20	6	8.2672	5.0986e-05	0.004972
Pfam	Treacle	9397	341	20	6	8.2672	5.0986e-05	0.0055538
GOMF name	structural constituent of cytoskeleton	9397	341	59	10	4.6707	3.7507e-05	0.0055838
Pfam	FA	9397	341	49	9	5.0615	4.7777e-05	0.0056046
GOCC name	intracellular organelle	9397	341	5027	211	1.1567	0.00028802	0.0057527
GOMF name	nucleotide binding	9397	341	1584	33	0.57411	4.3749e-05	0.0057895
Pfam	OSTMP1	9397	341	3	3	27.557	4.7381e-05	0.0060213
GOMF name	actin binding	9397	341	210	20	2.6245	5.0794e-05	0.0060496
GOBP name	transmembrane receptor protein tyrosine kinase signaling pathway	9397	341	257	0	0	6.5478e-05	0.0061651
Pfam	IR1-M	9397	341	19	6	8.7023	3.7012e-05	0.0062715
GOCC name	catalytic step 2 spliceosome	9397	341	330	2	0.16701	0.00033337	0.0064878
GOMF name	kinase activity	9397	341	617	7	0.31264	6.0368e-05	0.0065362
Pfam	ELYS	9397	341	3	3	27.557	4.7381e-05	0.0065687
GOBP name	induction of programmed cell death	9397	341	166	17	2.8221	7.5096e-05	0.0067229
GOBP name	regulation of cell cycle process	9397	341	288	24	2.2964	7.7592e-05	0.0068344
GOBP name	induction of apoptosis	9397	341	166	17	2.8221	7.5096e-05	0.006835
GOBP name	cellular response to organic substance	9397	341	476	4	0.23157	7.3912e-05	0.0068412
GOCC name	organelle	9397	341	5046	211	1.1523	0.00036543	0.0069341
Pfam	Apc1	9397	341	3	3	27.557	4.7381e-05	0.0072256
GOBP name	negative regulation of response to stimulus	9397	341	421	3	0.19637	9.1202e-05	0.0079056
GOMF name	sequence-specific DNA binding	9397	341	462	33	1.9684	8.0758e-05	0.0080153
GOBP name	response to stimulus	9397	341	2647	68	0.70793	9.7729e-05	0.008339
GOBP name	metallo-sulfur cluster assembly	9397	341	8	4	13.779	0.00010311	0.0085313
GOBP name	iron-sulfur cluster assembly	9397	341	8	4	13.779	0.00010311	0.0086625
GOCC name	plasma membrane part	9397	341	410	4	0.26885	0.00051063	0.0094528
GOBP name	cell division	9397	341	373	28	2.0686	0.00012016	0.0097936
GOCC name	centrosome	9397	341	273	21	2.1198	0.00055837	0.010091
GOBP name	nuclear pore organization	9397	341	15	5	9.1857	0.00012757	0.010245
GOMF name	protein serine/threonine kinase activity	9397	341	461	4	0.23911	0.00011575	0.010605
Pfam	Ran_BP1	9397	341	32	7	6.0281	0.00010611	0.010788
GOMF name	phosphotransferase activity, alcohol group as acceptor	9397	341	587	7	0.32862	0.0001358	0.011553
GOCC name	type III intermediate filament	9397	341	21	5	6.5612	0.00069452	0.011981
GOBP name	protein sumoylation	9397	341	45	8	4.8991	0.00015691	0.012069
GOBP name	positive regulation of spindle checkpoint	9397	341	24	6	6.8893	0.00015307	0.012115
GOCC name	organelle membrane	9397	341	658	39	1.6333	0.00072012	0.012146
GOBP name	cellular response to endogenous stimulus	9397	341	234	0	0	0.00015681	0.012234
GOCC name	paranode region of axon	9397	341	21	5	6.5612	0.00069452	0.012259
GOBP name	regulation of cellular catabolic process	9397	341	580	7	0.33259	0.00016356	0.012406
GOCC name	intracellular part	9397	341	7537	294	1.0749	0.00079406	0.012823
GOCC name	CCR4-NOT complex	9397	341	57	8	3.8677	0.00077828	0.012842
GOBP name	protein localization to paranode region of axon	9397	341	16	5	8.6116	0.00017891	0.013027
GOBP name	cell cycle phase	9397	341	268	22	2.2622	0.00018185	0.013067
GOBP name	protein localization to juxtaparanode region of axon	9397	341	16	5	8.6116	0.00017891	0.013203
GOBP name	paranodal junction assembly	9397	341	16	5	8.6116	0.00017891	0.013384
GOCC name	nuclear part	9397	341	2659	120	1.2436	0.0008669	0.013708
GOMF name	protein binding	9397	341	1576	81	1.4163	0.00018529	0.014712
GOBP name	mRNA processing	9397	341	650	9	0.38156	0.00021759	0.015432
GOBP name	nitrogen compound metabolic process	9397	341	2832	76	0.73953	0.00022098	0.015471
GOCC name	nuclear body	9397	341	619	10	0.44519	0.0011096	0.017188
GOBP name	cellular nitrogen compound metabolic process	9397	341	2821	76	0.74241	0.00025752	0.017801
GOCC name	nucleolus	9397	341	703	40	1.568	0.0012517	0.019001
GOBP name	regulation of spindle checkpoint	9397	341	27	6	6.1238	0.00030181	0.020603
GOCC name	mitotic spindle	9397	341	49	7	3.9367	0.0014598	0.021726
GOBP name	mitotic spindle organization	9397	341	64	9	3.8752	0.00037217	0.025092
GOBP name	response to hormone stimulus	9397	341	272	1	0.10131	0.00039065	0.026016
GOBP name	muscle organ development	9397	341	52	8	4.2396	0.00042497	0.027628
GOMF name	cytoskeletal protein binding	9397	341	505	33	1.8008	0.00037172	0.02767
GOMF name	protein kinase activity	9397	341	546	7	0.3533	0.0003964	0.027771
GOBP name	primary metabolic process	9397	341	3773	110	0.80342	0.00042467	0.027941
GOMF name	peptidyl-prolyl cis-trans isomerase activity	9397	341	29	6	5.7015	0.00045032	0.028228
GOBP name	nucleobase-containing compound metabolic process	9397	341	2779	76	0.75363	0.00045366	0.028476
GOBP name	RNA metabolic process	9397	341	2299	60	0.7192	0.00045144	0.028666
GOBP name	protein peptidyl-prolyl isomerization	9397	341	29	6	5.7015	0.00045032	0.028932
GOBP name	nucleic acid metabolic process	9397	341	2685	73	0.74923	0.0004834	0.029661
GOMF name	cis-trans isomerase activity	9397	341	29	6	5.7015	0.00045032	0.029796
GOBP name	muscle structure development	9397	341	53	8	4.1596	0.00048268	0.029954
GOMF name	ribonucleotide binding	9397	341	1178	25	0.58483	0.00055631	0.030116
GOMF name	metal cluster binding	9397	341	12	4	9.1857	0.00062992	0.03126
GOMF name	purine ribonucleotide binding	9397	341	1178	25	0.58483	0.00055631	0.031551
GOBP name	spindle pole body separation	9397	341	30	6	5.5114	0.00054277	0.031872
GOBP name	negative regulation of cell communication	9397	341	362	3	0.22837	0.00055329	0.032144
GOMF name	purine ribonucleoside triphosphate binding	9397	341	1167	25	0.59034	0.00067539	0.032175
GOBP name	nuclear envelope organization	9397	341	30	6	5.5114	0.00054277	0.032218
GOMF name	purine nucleotide binding	9397	341	1179	25	0.58433	0.00054651	0.032544
GOBP name	microtubule sliding	9397	341	30	6	5.5114	0.00054277	0.032572
GOBP name	response to endogenous stimulus	9397	341	363	3	0.22775	0.00053703	0.032586
GOMF name	iron-sulfur cluster binding	9397	341	12	4	9.1857	0.00062992	0.032619
GOCC name	cytoskeleton	9397	341	849	45	1.4606	0.0023569	0.034402
GOBP name	negative regulation of signaling	9397	341	359	3	0.23028	0.00060498	0.034777
GOBP name	enzyme linked receptor protein signaling pathway	9397	341	310	2	0.17779	0.00062968	0.03582
GOBP name	spindle organization	9397	341	99	11	3.0619	0.00065365	0.036424
GOBP name	peptidyl-proline modification	9397	341	31	6	5.3336	0.00064896	0.036536
GOBP name	transmembrane transport	9397	341	21	5	6.5612	0.00069452	0.037184
GOBP name	lens fiber cell development	9397	341	21	5	6.5612	0.00069452	0.037552
GOBP name	Bergmann glial cell differentiation	9397	341	21	5	6.5612	0.00069452	0.037928
GOBP name	nucleus organization	9397	341	56	8	3.9367	0.00069378	0.03827
GOBP name	regulation of primary metabolic process	9397	341	3036	86	0.78061	0.00072724	0.038558
GOBP name	regulation of catabolic process	9397	341	637	10	0.43261	0.00074094	0.038907
GOBP name	rRNA transcription	9397	341	32	6	5.167	0.00077016	0.039307
GOBP name	cellular response to chemical stimulus	9397	341	636	10	0.43329	0.00075795	0.03942
GOBP name	negative regulation of signal transduction	9397	341	351	3	0.23553	0.00076675	0.039502
GOMF name	structural constituent of eye lens	9397	341	22	5	6.263	0.00086658	0.039696
GOCC name	cytoplasmic part	9397	341	2839	123	1.1939	0.0028172	0.040344
Pfam	Pro_isomerase	9397	341	29	6	5.7015	0.00045032	0.040396
GOCC name	nucleus	9397	341	2824	83	0.80993	0.0029426	0.040608
GOCC name	nucleoplasm part	9397	341	1201	29	0.66541	0.0031087	0.040681
GOCC name	extrinsic to membrane	9397	341	104	10	2.6497	0.0030591	0.040735
GOCC name	spliceosomal complex	9397	341	426	6	0.38813	0.0029034	0.040809
GOCC name	peroxisome	9397	341	29	5	4.7512	0.0030266	0.041021
GOCC name	condensed nuclear chromosome, centromeric region	9397	341	9	3	9.1857	0.0031943	0.041092
Pfam	NifU_N	9397	341	5	3	16.534	0.00044033	0.041969
GOBP name	nuclear pore complex assembly	9397	341	6	3	13.779	0.00084896	0.042927
Pfam	zf-RanBP	9397	341	41	7	4.7049	0.00051108	0.0433
GOCC name	intrinsic to endoplasmic reticulum membrane	9397	341	30	5	4.5929	0.0035016	0.04357
GOCC name	integral to endoplasmic reticulum membrane	9397	341	30	5	4.5929	0.0035016	0.044296
GOBP name	RNA splicing	9397	341	589	9	0.42108	0.00093618	0.046903

## Sheet: S6 (KEGG)
Category column	Category value	Total size	Selection size	Category size	Intersection size	Enrichment factor	P value	Benj. Hoch. FDR	+/-10 log2(p)
KEGG name	Vasopressin-regulated water reabsorption	9397	341	18	6	9.1857	2.6262e-05	0.001707	91.9432
KEGG name	Vascular smooth muscle contraction	9397	341	91	13	3.9367	1.788e-05	0.0017433	91.6396
KEGG name	Ribosome	9397	341	43	9	5.7678	1.629e-05	0.0031766	82.983

## Sheet: S7 (PFAM)
Category column	Category value	Total size	Selection size	Category size	Intersection size	Enrichment factor	P value	Benj. Hoch. FDR	+/-10 log2(p)
Pfam	DNA_pol_phi	9397	341	22	15	18.789	2.4545e-17	3.7431e-14	446.028
Pfam	Caldesmon	9397	341	20	11	15.156	1.4943e-11	7.5959e-09	269.721
Pfam	Filament	9397	341	75	19	6.9812	1.0641e-11	8.1138e-09	268.77
Pfam	LTD	9397	341	27	11	11.227	9.0257e-10	3.441e-07	214.707
Pfam	Ribosomal_L1	9397	341	5	5	27.557	6.1164e-08	1.8655e-05	157.101
Pfam	DLIC	9397	341	10	6	16.534	3.9736e-07	0.000101	132.734
Pfam	Nup35_RRM	9397	341	7	5	19.684	1.1942e-06	0.00026016	119.083
Pfam	MARCKS	9397	341	18	7	10.717	1.6674e-06	0.00031786	116.193
Pfam	Treacle	9397	341	20	6	8.2672	5.0986e-05	0.0055538	74.9231
Pfam	FA	9397	341	49	9	5.0615	4.7777e-05	0.0056046	74.7917
Pfam	OSTMP1	9397	341	3	3	27.557	4.7381e-05	0.0060213	73.7571
Pfam	IR1-M	9397	341	19	6	8.7023	3.7012e-05	0.0062715	73.1697
Pfam	ELYS	9397	341	3	3	27.557	4.7381e-05	0.0065687	72.5018
Pfam	Apc1	9397	341	3	3	27.557	4.7381e-05	0.0072256	71.1267
Pfam	Ran_BP1	9397	341	32	7	6.0281	0.00010611	0.010788	65.3443
Pfam	Pro_isomerase	9397	341	29	6	5.7015	0.00045032	0.040396	46.2964
Pfam	NifU_N	9397	341	5	3	16.534	0.00044033	0.041969	45.7453
Pfam	zf-RanBP	9397	341	41	7	4.7049	0.00051108	0.0433	45.2949

## Sheet: S8 (GOCC)
Category column	Category value	Total size	Selection size	Category size	Intersection size	Enrichment factor	P value	Benj. Hoch. FDR	+/-10 log2(p)
GOCC name	nuclear speck	9397	341	478	4	0.2306	6.9594e-05	0.0017607	-91.4964
GOCC name	catalytic step 2 spliceosome	9397	341	330	2	0.16701	0.00033337	0.0064878	-72.6805
GOCC name	plasma membrane part	9397	341	410	4	0.26885	0.00051063	0.0094528	-67.2504
GOCC name	nuclear body	9397	341	619	10	0.44519	0.0011096	0.017188	-58.6245
GOCC name	nucleus	9397	341	2824	83	0.80993	0.0029426	0.040608	-46.2209
GOCC name	nucleoplasm part	9397	341	1201	29	0.66541	0.0031087	0.040681	-46.195
GOCC name	spliceosomal complex	9397	341	426	6	0.38813	0.0029034	0.040809	-46.1497
GOCC name	nucleocytoplasmic shuttling complex	9397	341	22	15	18.789	2.4545e-17	9.3147e-15	466.094
GOCC name	NLS-dependent protein nuclear import complex	9397	341	22	15	18.789	2.4545e-17	1.8629e-14	456.094
GOCC name	intracellular organelle part	9397	341	4338	217	1.3785	1.5757e-11	2.9898e-09	283.173
GOCC name	organelle part	9397	341	4406	219	1.3697	2.171e-11	3.2956e-09	281.768
GOCC name	actin cap	9397	341	20	11	15.156	1.4943e-11	3.7805e-09	279.788
GOCC name	large ribosomal subunit	9397	341	27	12	12.248	4.3926e-11	5.5566e-09	274.232
GOCC name	intermediate filament	9397	341	84	19	6.2332	8.9296e-11	9.6823e-09	266.22
GOCC name	non-membrane-bounded organelle	9397	341	2360	137	1.5997	1.8103e-10	1.5267e-08	259.65
GOCC name	intracellular non-membrane-bounded organelle	9397	341	2360	137	1.5997	1.8103e-10	1.7175e-08	257.951
GOCC name	lamin filament	9397	341	27	11	11.227	9.0257e-10	6.8505e-08	237.992
GOCC name	nuclear membrane	9397	341	203	27	3.6652	3.3104e-09	2.2842e-07	220.618
GOCC name	germinal vesicle	9397	341	10	7	19.29	8.4023e-09	5.3145e-07	208.436
GOCC name	kinetochore	9397	341	162	23	3.9124	1.4187e-08	8.2833e-07	202.033
GOCC name	organelle envelope	9397	341	113	18	4.3896	9.106e-08	4.3197e-06	178.206
GOCC name	nuclear envelope	9397	341	113	18	4.3896	9.106e-08	4.6076e-06	177.276
GOCC name	female germ cell nucleus	9397	341	13	7	14.838	1.0778e-07	4.8119e-06	176.65
GOCC name	envelope	9397	341	113	18	4.3896	9.106e-08	4.9367e-06	176.28
GOCC name	cytoskeletal part	9397	341	1328	82	1.7016	2.2892e-07	9.653e-06	166.606
GOCC name	macromolecular complex	9397	341	3176	158	1.3709	3.0672e-07	1.2253e-05	163.165
GOCC name	germ cell nucleus	9397	341	16	7	12.056	6.4448e-07	2.4458e-05	153.193
GOCC name	dynein complex	9397	341	18	7	10.717	1.6674e-06	6.0266e-05	140.183
GOCC name	protein complex	9397	341	2474	126	1.4035	3.0801e-06	0.00010626	132.001
GOCC name	condensed chromosome kinetochore	9397	341	103	15	4.0132	3.3008e-06	0.00010893	131.643
GOCC name	membrane	9397	341	1940	104	1.4773	3.4525e-06	0.00010919	131.609
GOCC name	cytoplasmic dynein complex	9397	341	14	6	11.81	4.9134e-06	0.00014917	127.108
GOCC name	nuclear inner membrane	9397	341	38	9	6.5267	5.6413e-06	0.00016468	125.68
GOCC name	nuclear pore	9397	341	42	9	5.9051	1.3355e-05	0.00037542	113.792
GOCC name	pore complex	9397	341	47	9	5.2769	3.4065e-05	0.00092341	100.807
GOCC name	chromosomal part	9397	341	712	46	1.7804	4.1729e-05	0.0010921	98.3868
GOCC name	cytosolic large ribosomal subunit	9397	341	14	5	9.8419	8.8207e-05	0.0021596	88.5502
GOCC name	nuclear inclusion body	9397	341	33	7	5.8455	0.00012988	0.0030805	83.4262
GOCC name	cell cortex part	9397	341	82	11	3.6967	0.00013414	0.0030851	83.4047
GOCC name	organelle inner membrane	9397	341	57	9	4.3511	0.00015664	0.0034968	81.5975
GOCC name	Nup107-160 complex	9397	341	9	4	12.248	0.00017893	0.0037724	80.503
GOCC name	juxtaparanode region of axon	9397	341	16	5	8.6116	0.00017891	0.0038799	80.0976
GOCC name	cytoplasm	9397	341	2816	130	1.2722	0.00021091	0.0043266	78.5255
GOCC name	intracellular organelle	9397	341	5027	211	1.1567	0.00028802	0.0057527	74.4155
GOCC name	organelle	9397	341	5046	211	1.1523	0.00036543	0.0069341	71.7208
GOCC name	centrosome	9397	341	273	21	2.1198	0.00055837	0.010091	66.3079
GOCC name	type III intermediate filament	9397	341	21	5	6.5612	0.00069452	0.011981	63.8311
GOCC name	organelle membrane	9397	341	658	39	1.6333	0.00072012	0.012146	63.6337
GOCC name	paranode region of axon	9397	341	21	5	6.5612	0.00069452	0.012259	63.5001
GOCC name	intracellular part	9397	341	7537	294	1.0749	0.00079406	0.012823	62.8512
GOCC name	CCR4-NOT complex	9397	341	57	8	3.8677	0.00077828	0.012842	62.8299
GOCC name	nuclear part	9397	341	2659	120	1.2436	0.0008669	0.013708	61.8884
GOCC name	nucleolus	9397	341	703	40	1.568	0.0012517	0.019001	57.1778
GOCC name	mitotic spindle	9397	341	49	7	3.9367	0.0014598	0.021726	55.2443
GOCC name	cytoskeleton	9397	341	849	45	1.4606	0.0023569	0.034402	48.6136
GOCC name	cytoplasmic part	9397	341	2839	123	1.1939	0.0028172	0.040344	46.315
GOCC name	extrinsic to membrane	9397	341	104	10	2.6497	0.0030591	0.040735	46.1759
GOCC name	peroxisome	9397	341	29	5	4.7512	0.0030266	0.041021	46.0749
GOCC name	condensed nuclear chromosome, centromeric region	9397	341	9	3	9.1857	0.0031943	0.041092	46.05
GOCC name	intrinsic to endoplasmic reticulum membrane	9397	341	30	5	4.5929	0.0035016	0.04357	45.2052
GOCC name	integral to endoplasmic reticulum membrane	9397	341	30	5	4.5929	0.0035016	0.044296	44.9668

[truncated: 2 more sheets: S9 (GOMF), S10 (GOBP)]
